# Supplementary material for: A chiral salen-based MOF catalytic material with high thermal, aqueous and chemical stabilities
Source: Royal Society of Chemistry journal article supplement (doi:10.1039/c7dt01116d), 2017-01-01
Supplement: c7dt01116d1.pdf [file c7dt01116d1.pdf]

## Supporting Information for

# A Chiral Salen-based MOF Catalytic Material with highly thermal, aqueous and chemical stabilities

Jiawei Li, Yanwei Ren,\* Chaorong Qi and Huanfeng Jiang\*

*Key Laboratory of Functional Molecular Engineering of Guangdong Province,*

*School of Chemistry and Chemical Engineering, South China University of Technology,*

*Guangzhou 510640, P. R. China*

### Content

|                                                                                                                              |    |
|------------------------------------------------------------------------------------------------------------------------------|----|
| 1. <b>Figure S1.</b> IR spectrum of L .....                                                                                  | 2  |
| 2. <b>Figure S2.</b> IR spectrum of <b>1</b> .....                                                                           | 2  |
| 3. <b>Figure S3.</b> UV-vis spectrum of L .....                                                                              | 3  |
| 4. <b>Figure S4.</b> <sup>1</sup> H NMR of L .....                                                                           | 3  |
| 5. <b>Figure S5.</b> <sup>13</sup> C NMR of L .....                                                                          | 4  |
| 6. <b>Figure S6.</b> HR-MS of L .....                                                                                        | 4  |
| 7. <b>Figure S7.</b> <sup>1</sup> H NMR of NiL and <b>1</b> .....                                                            | 5  |
| 8. <b>Figure S8.</b> Asymmetric unit of <b>1</b> .....                                                                       | 6  |
| 9. <b>Figure S9.</b> Space-filling model of the 8-fold interpenetrated framework along <i>a</i> axis .....                   | 6  |
| 10. <b>Figure S10.</b> TG curve of <b>1</b> .....                                                                            | 7  |
| 11. <b>Figure S11.</b> NMR data of β-hydroxy-1,2,3-triazoles .....                                                           | 11 |
| 12. <b>Figure S12.</b> GC-MS analyses of the cyclic carbonates .....                                                         | 15 |
| 13. <b>Figure S13.</b> Proposed mechanism for the cycloaddition of CO <sub>2</sub> with epoxides catalyzed by <b>1</b> ..... | 16 |
| 14. <b>Table S1.</b> BET plot data for <b>1</b> .....                                                                        | 17 |

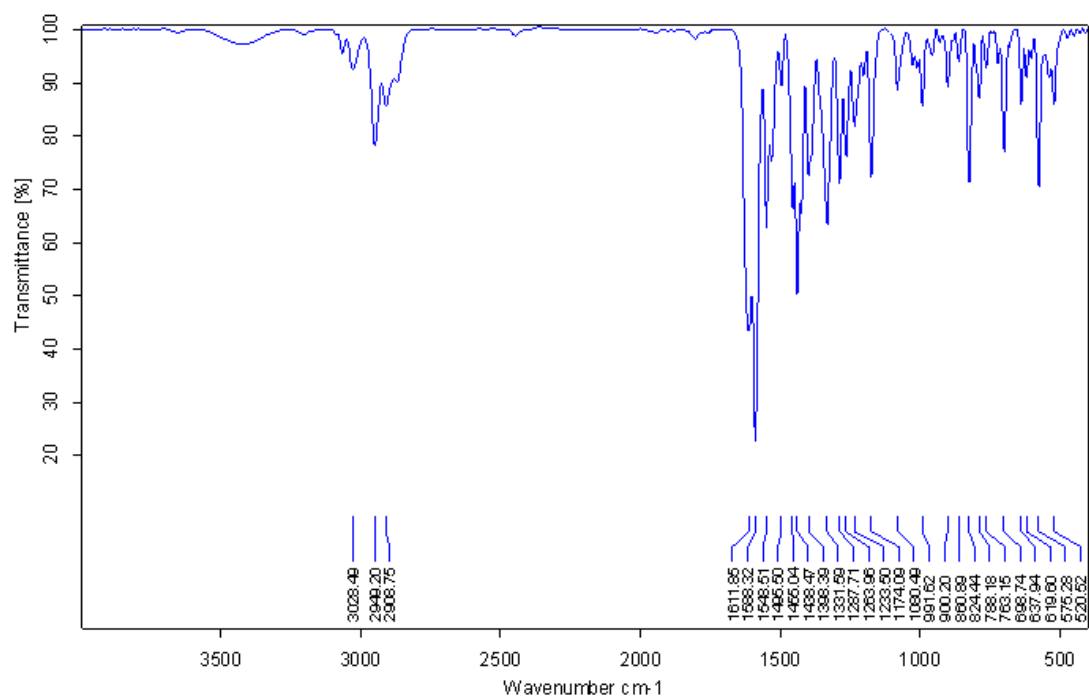

**Figure S1.** IR spectrum of L

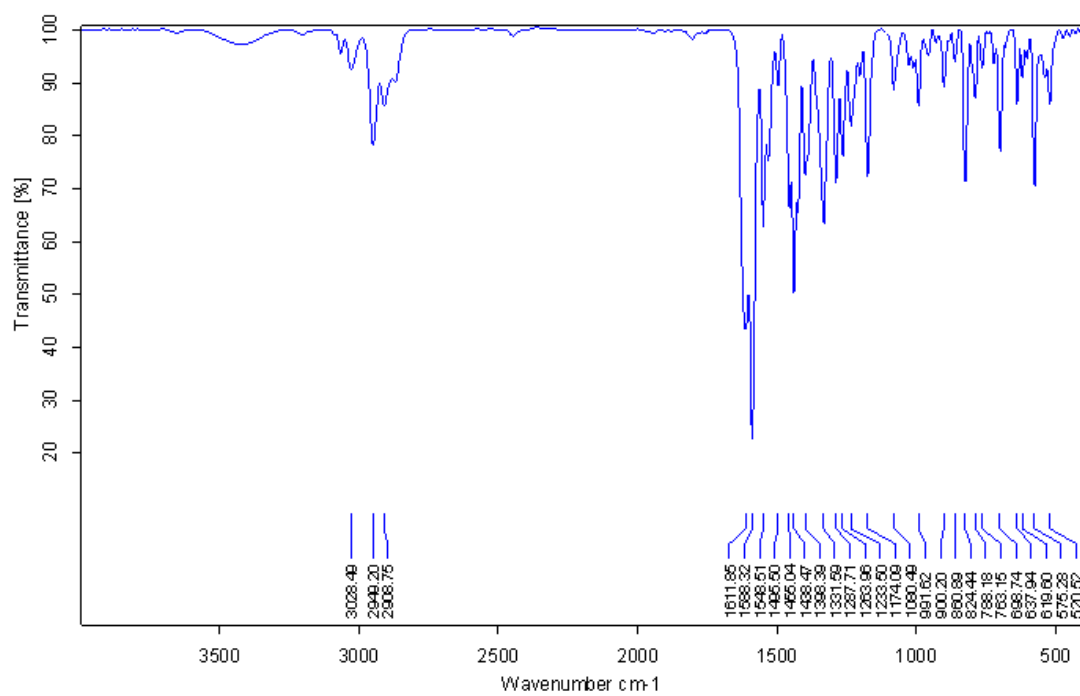

**Figure S2.** IR spectrum of 1

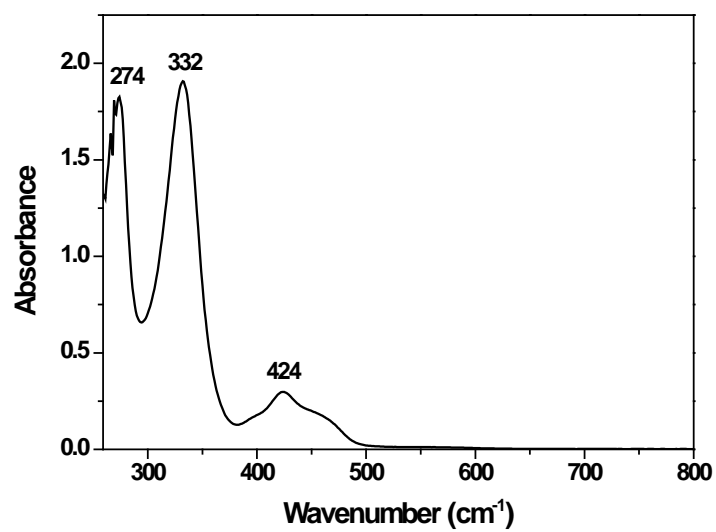

Figure S3. UV-vis spectrum of L

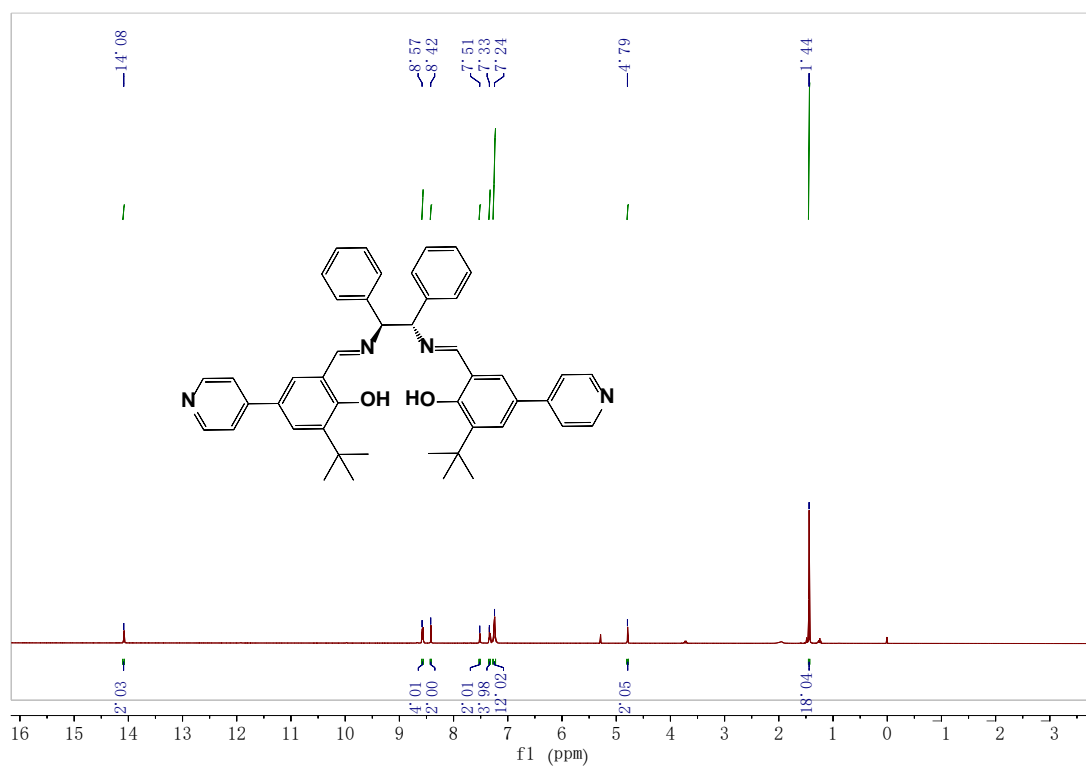

Figure S4. <sup>1</sup>H NMR of L

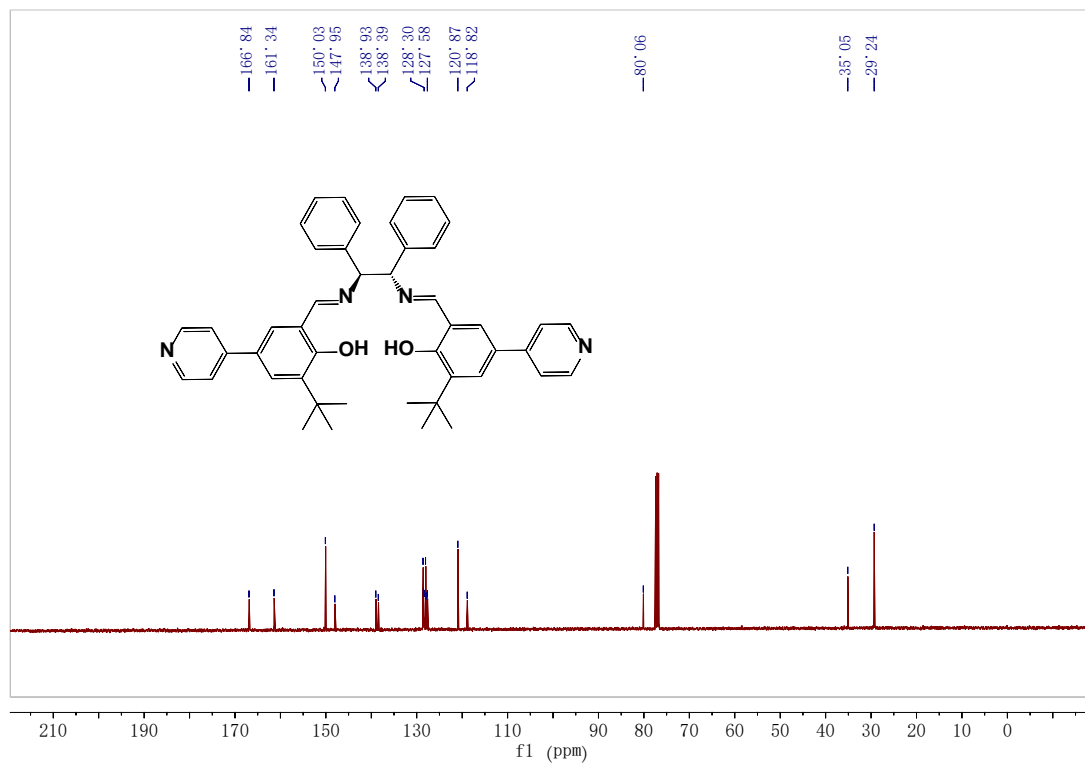

Figure S5. <sup>13</sup>C NMR of L

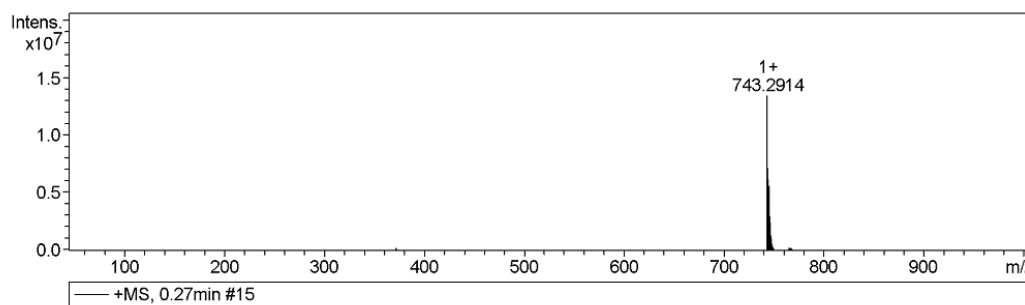

Figure S6. HR-MS of L

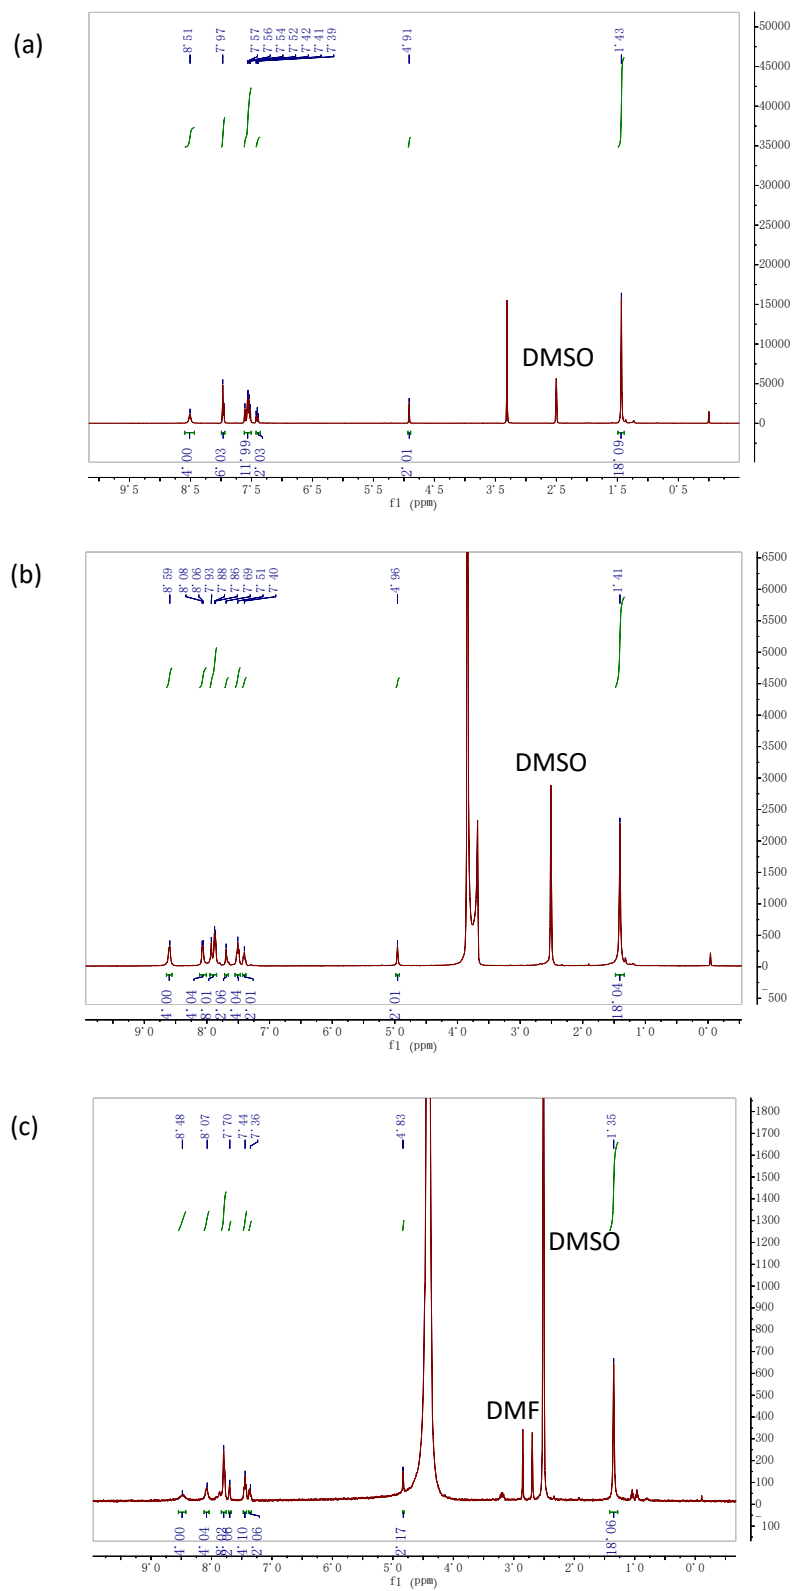

**Figure S7.** (a)  $^1\text{H}$  NMR of NiL in *d*-DMSO; (b)  $^1\text{H}$  NMR of NiL in *d*-DCl and *d*-DMSO (V/V, 1:1); (c)  $^1\text{H}$  NMR of **1** after dissolved in *d*-DCl and *d*-DMSO (V/V, 1:1).

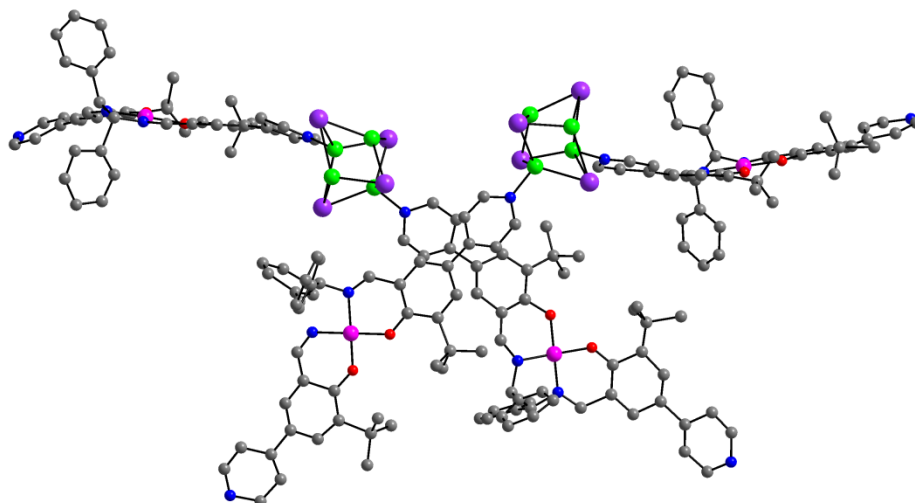

Figure S8. Asymmetric unit of 1

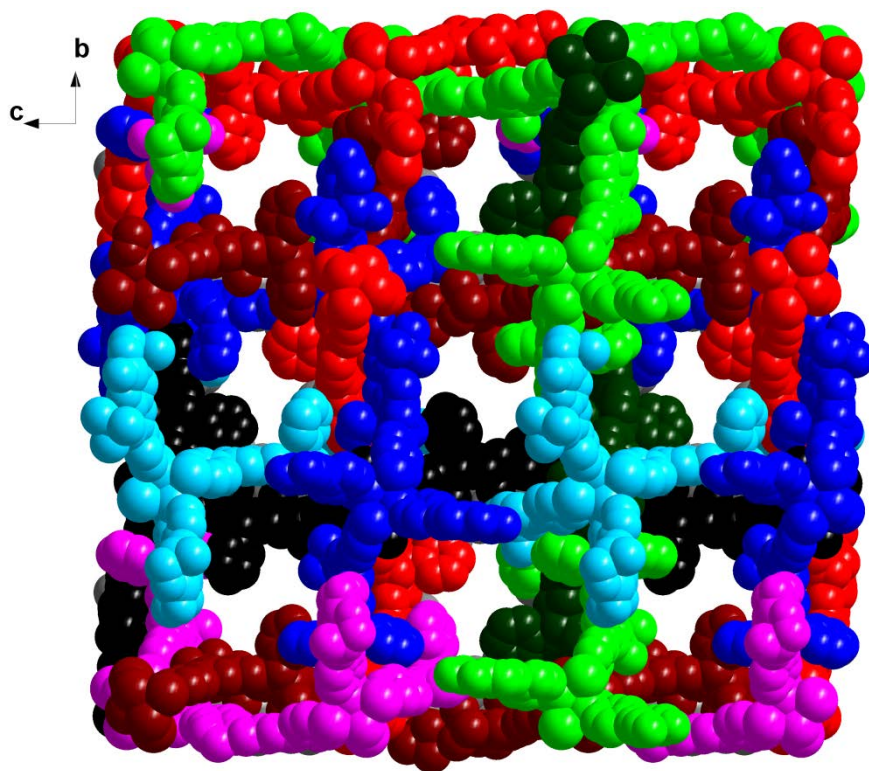

Figure S9. Space-filling model of the 8-fold interpenetrated framework along *a* axis

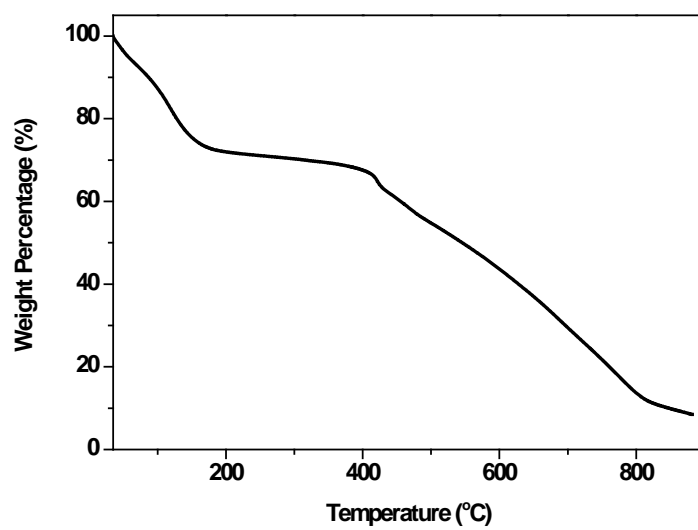

Figure S10. TG curve of 1

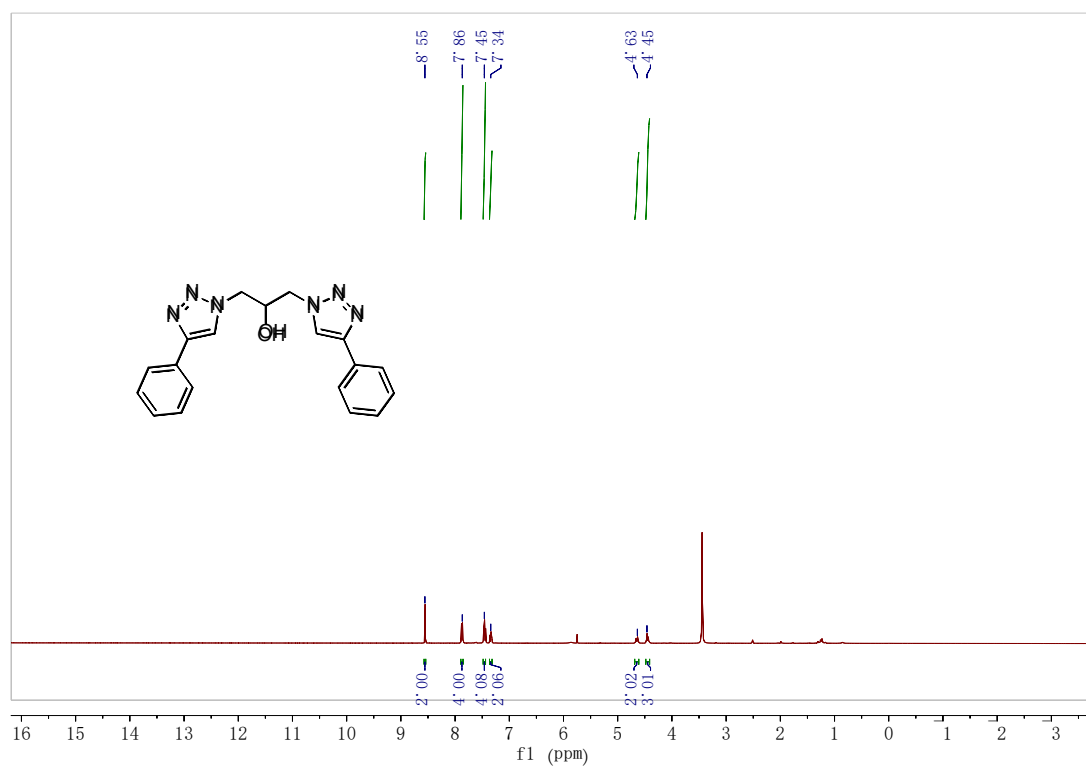

<sup>1</sup>H NMR

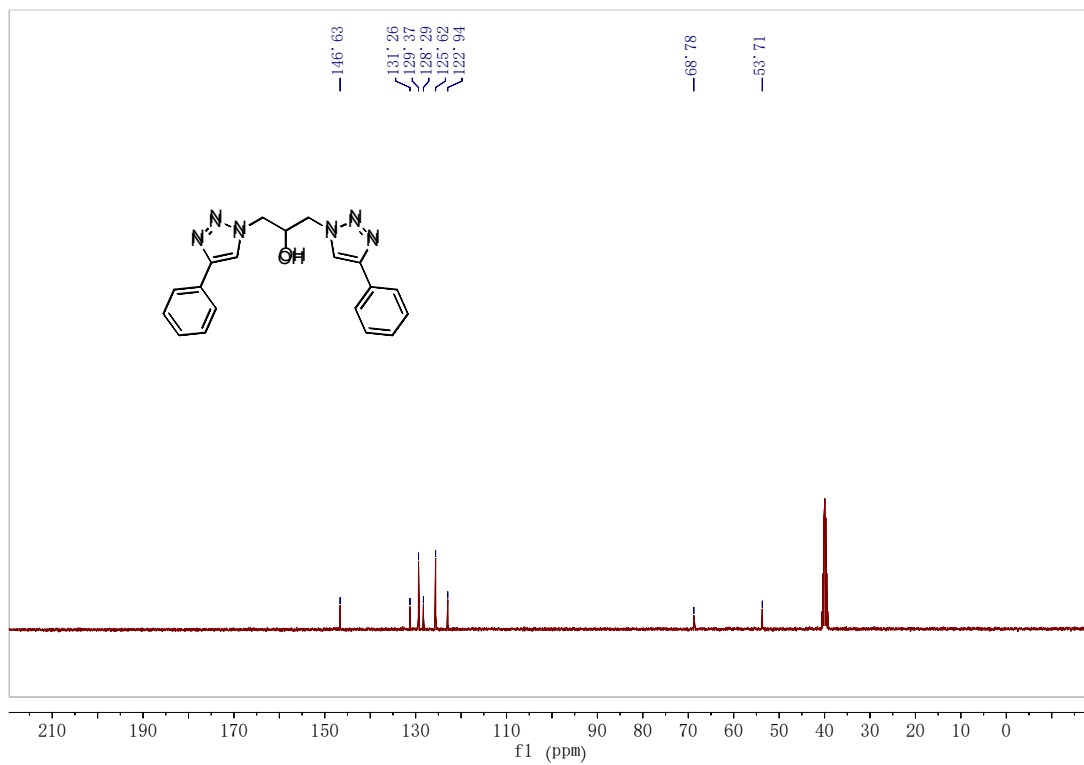

<sup>13</sup>C NMR

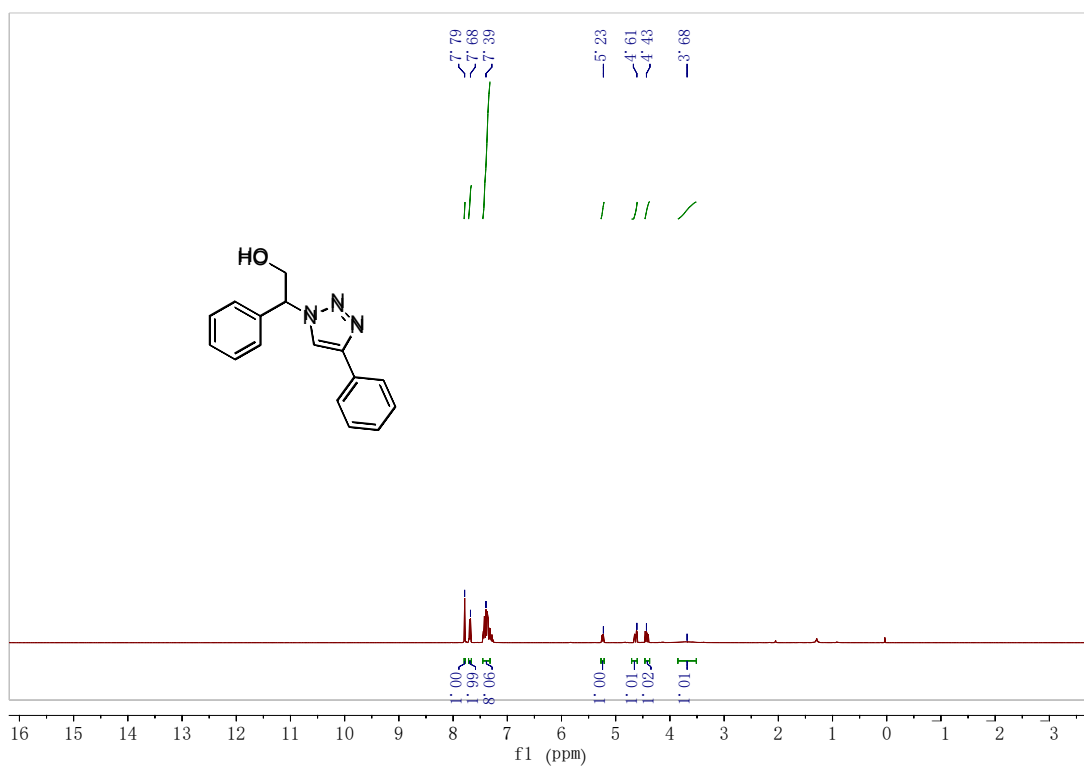

<sup>1</sup>H NMR



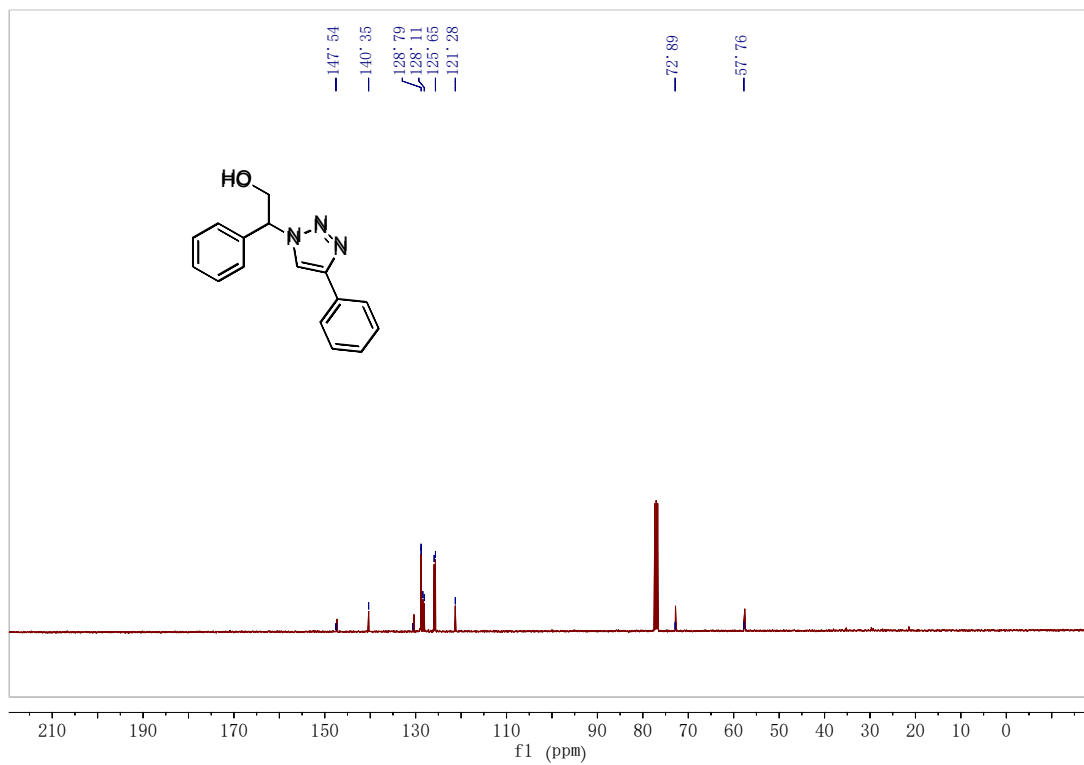

<sup>13</sup>C NMR

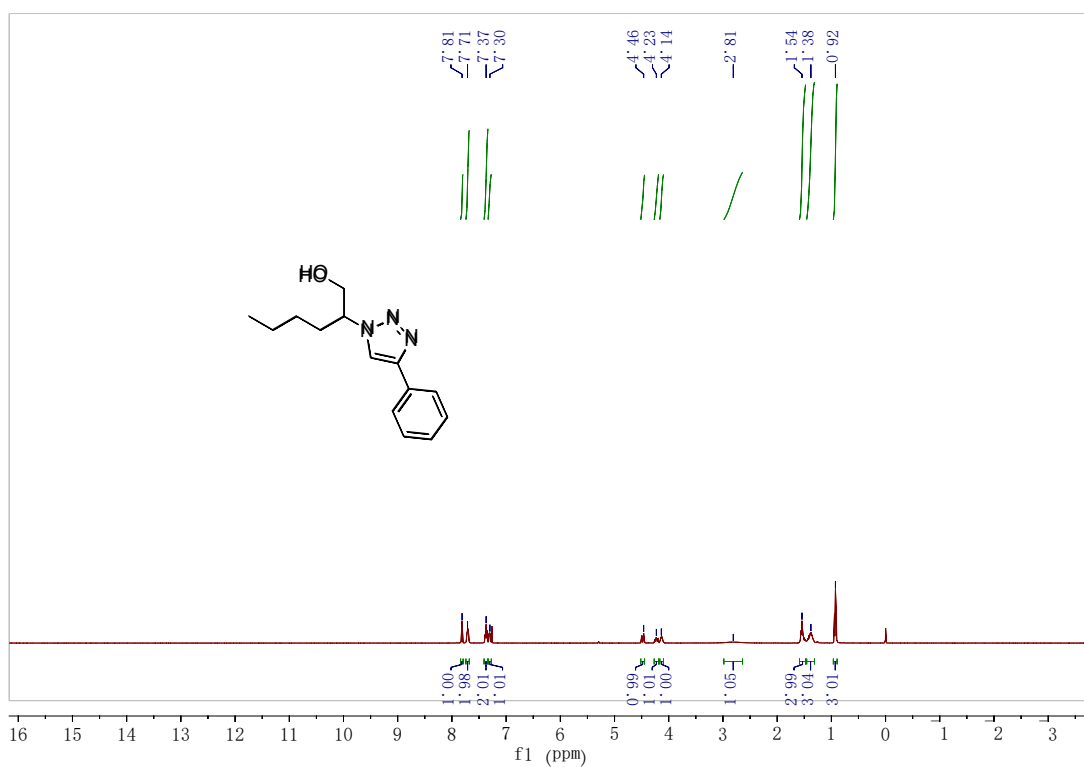

<sup>1</sup>H NMR

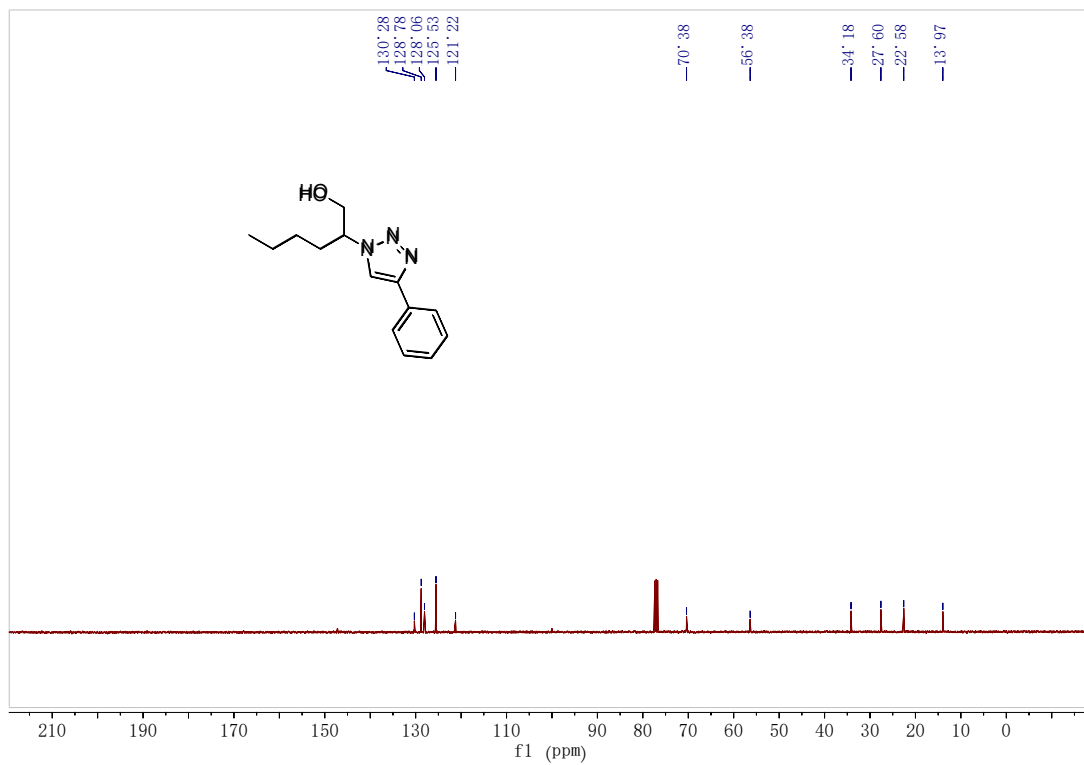

<sup>13</sup>C NMR

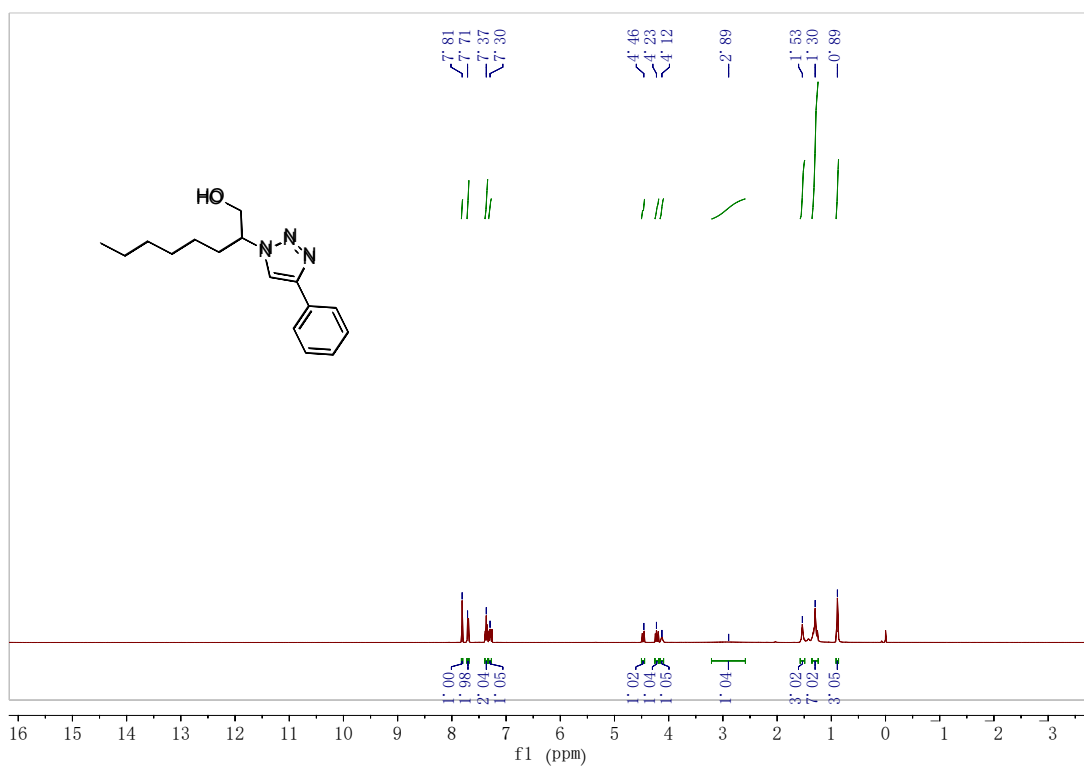

<sup>1</sup>H NMR

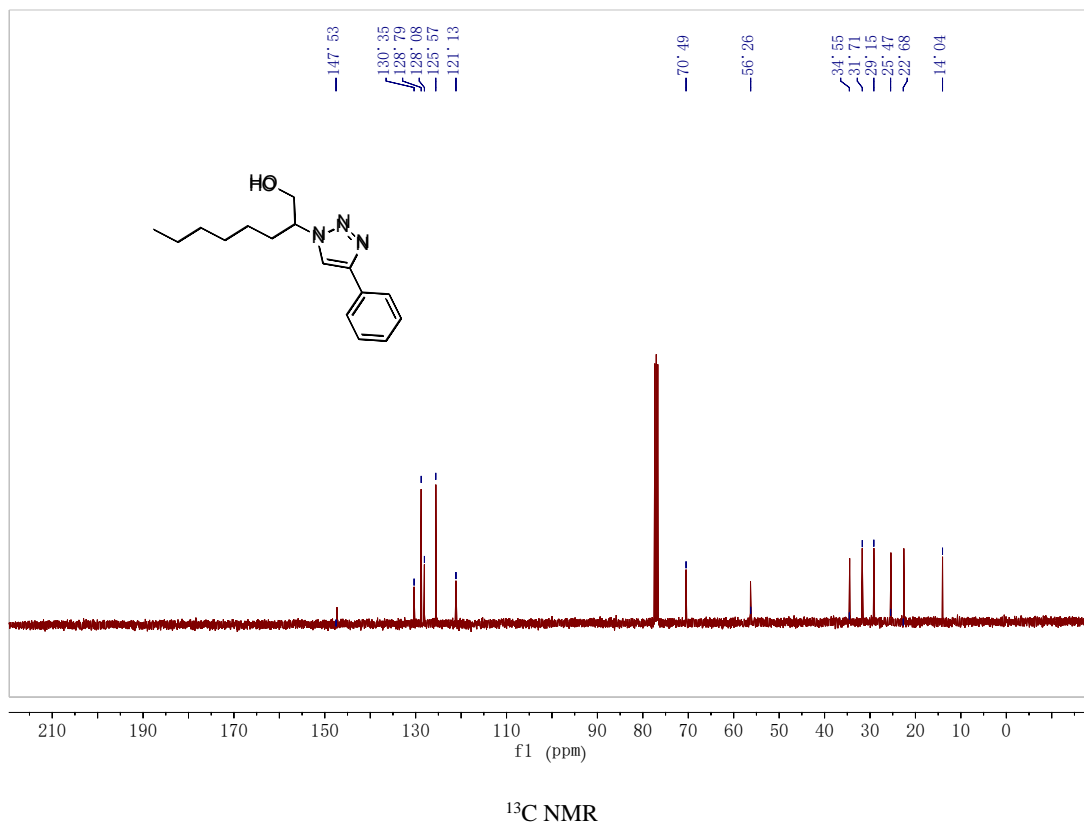

**Figure S11.** NMR spectra of β-hydroxy-1,2,3-triazoles

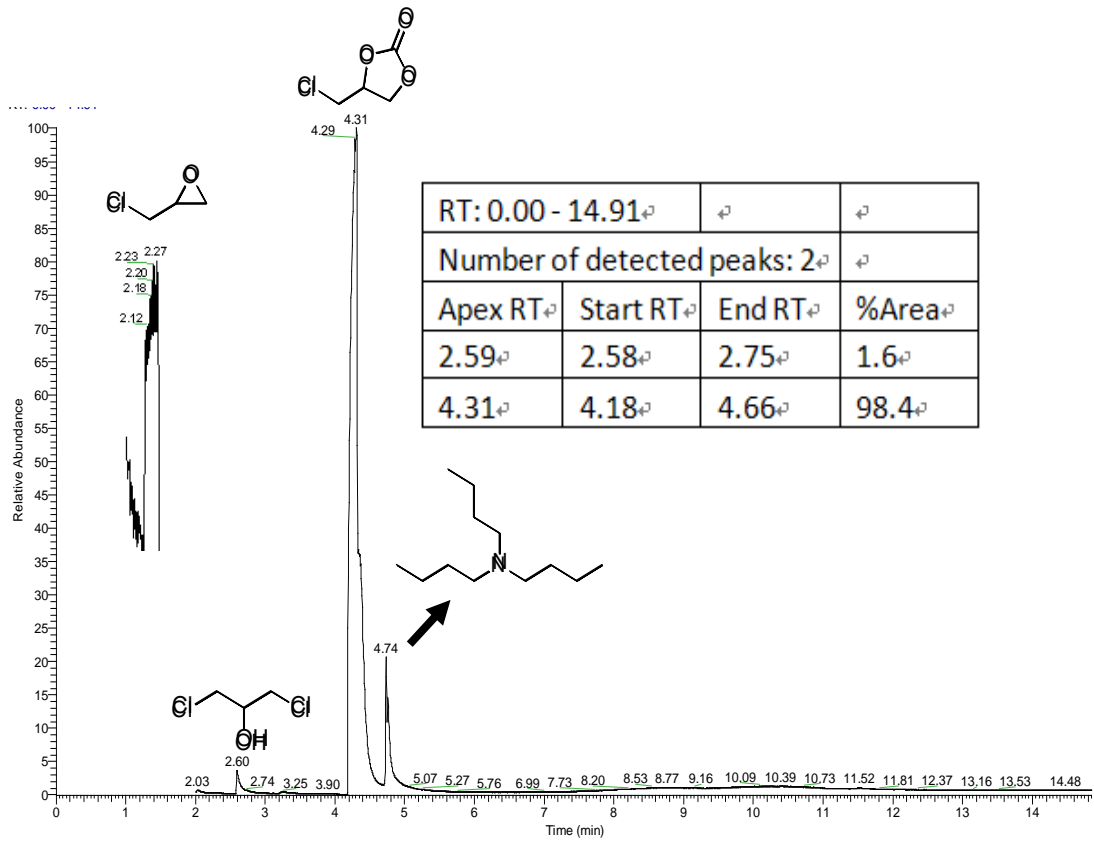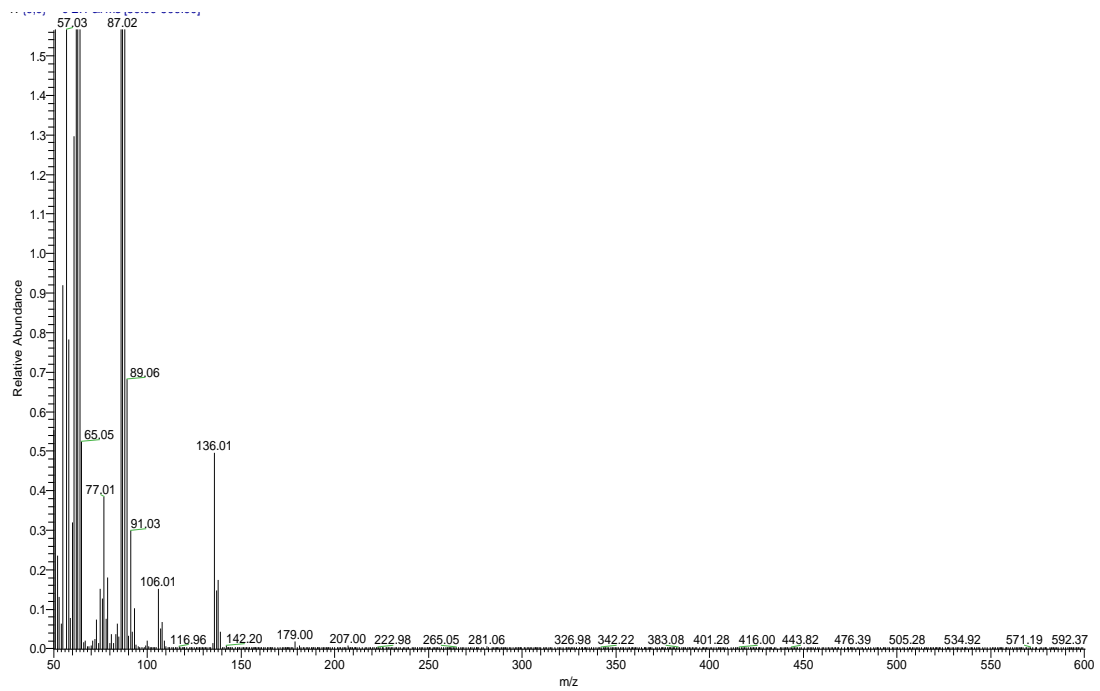

K1: U.UU - 14.4b

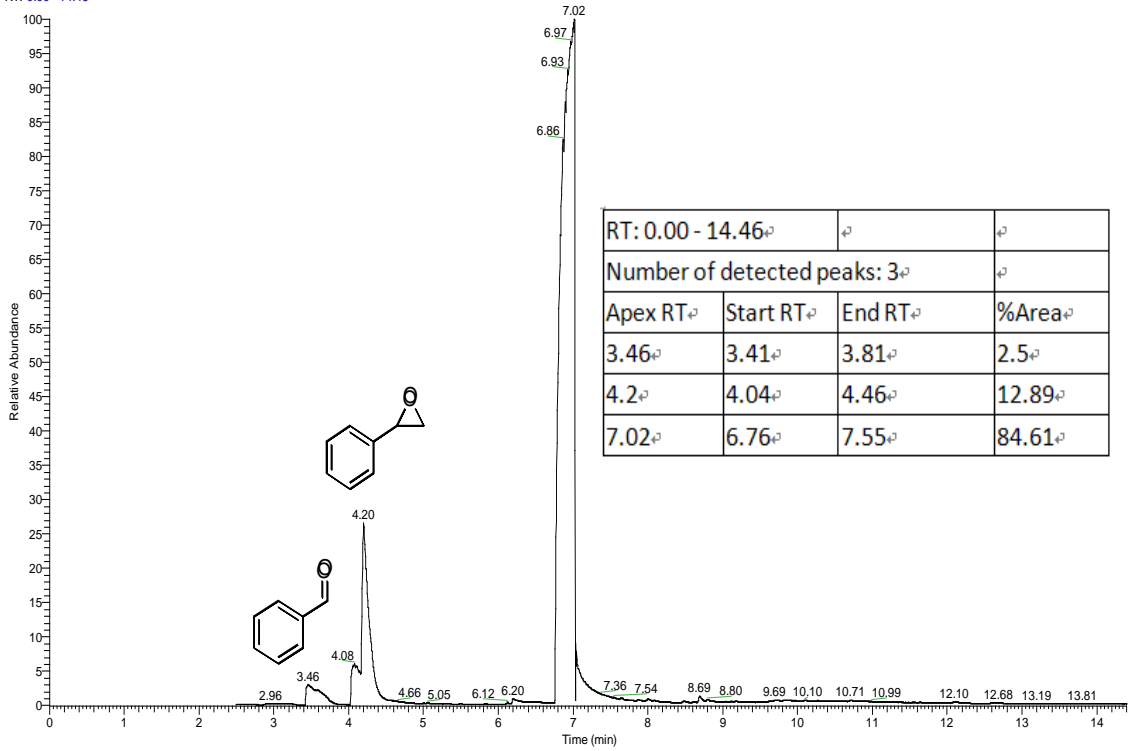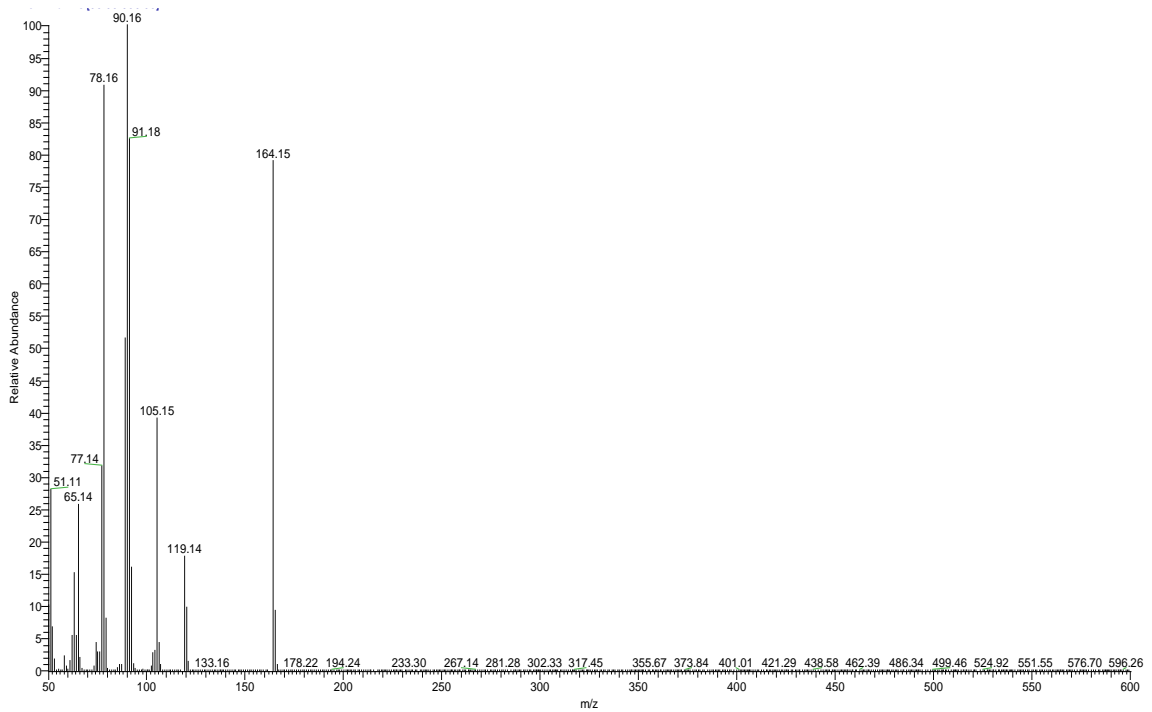

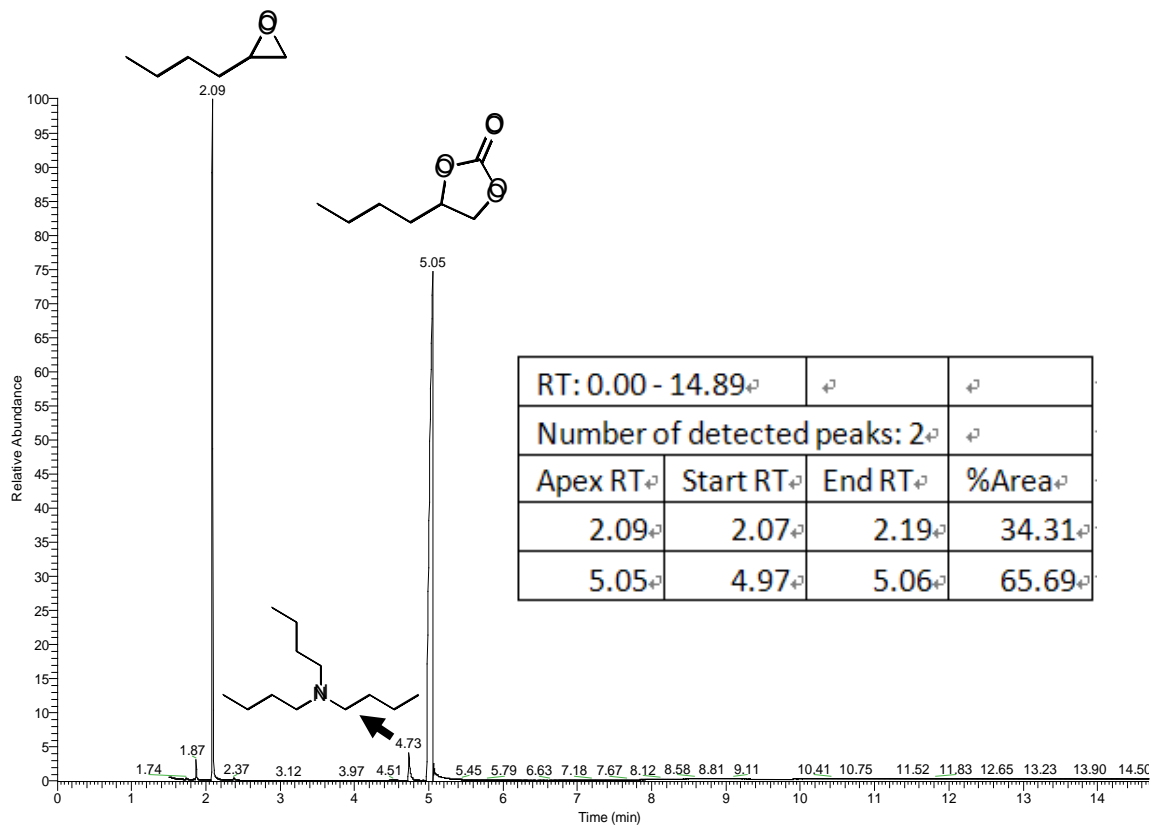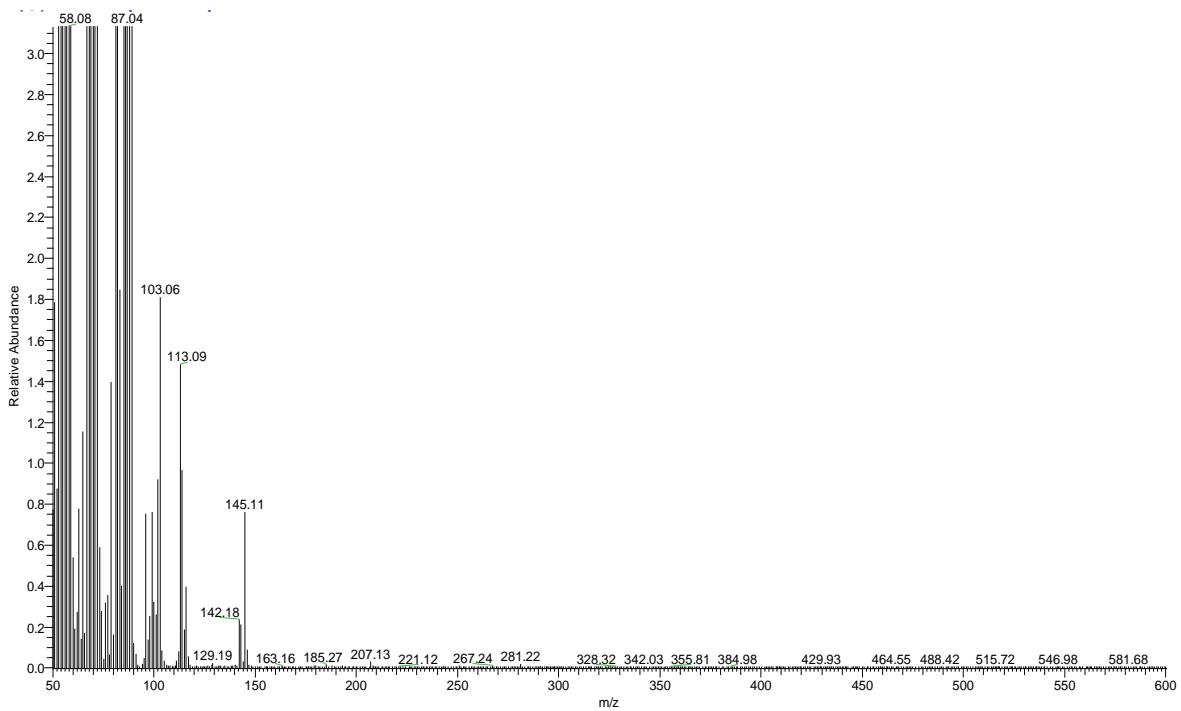

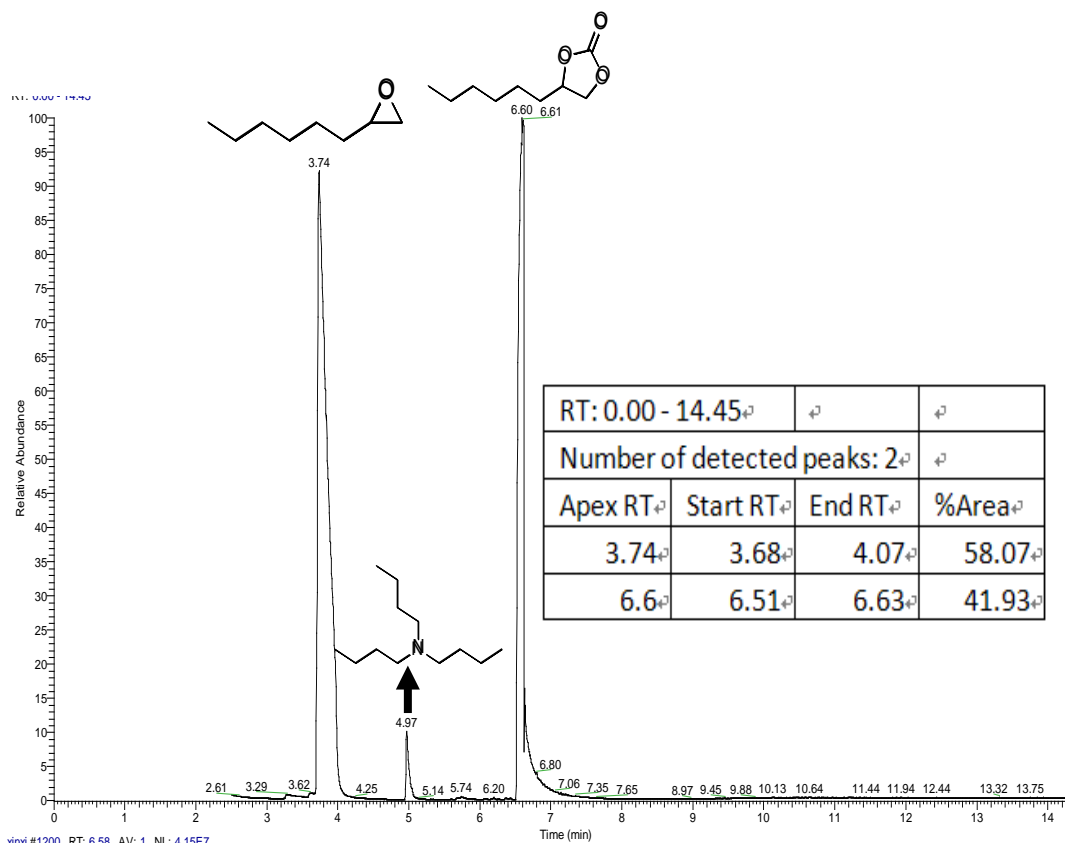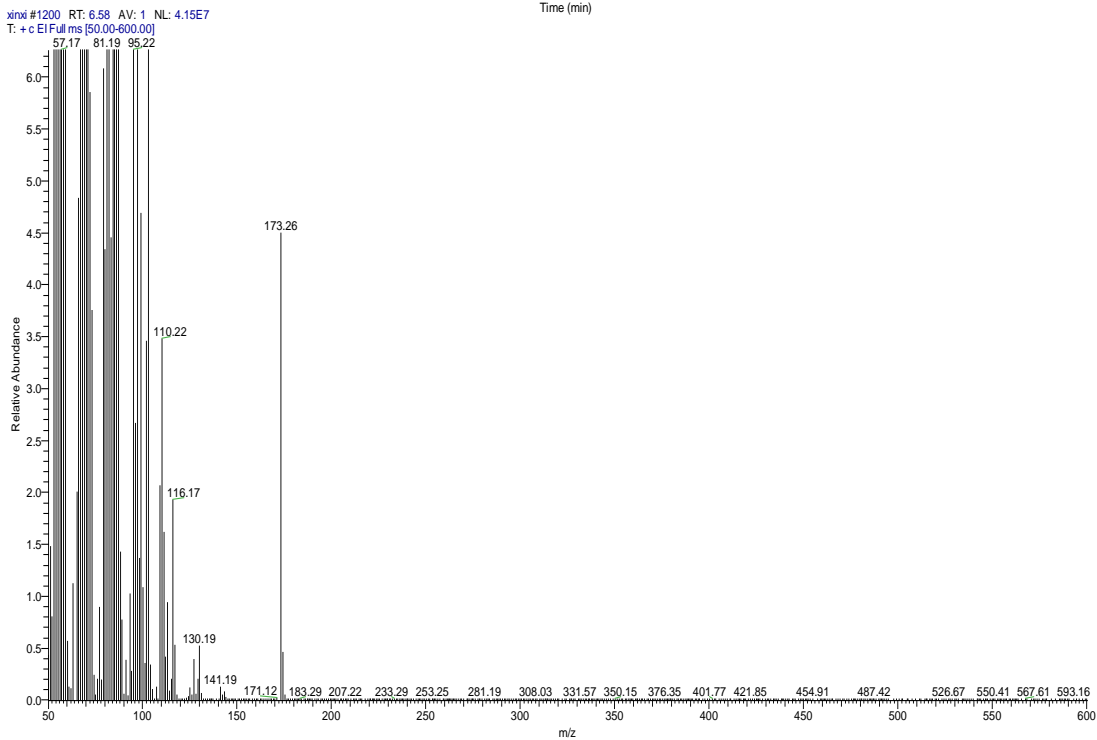

**Figure S12.** GC-MS analyses of the cyclic carbonates

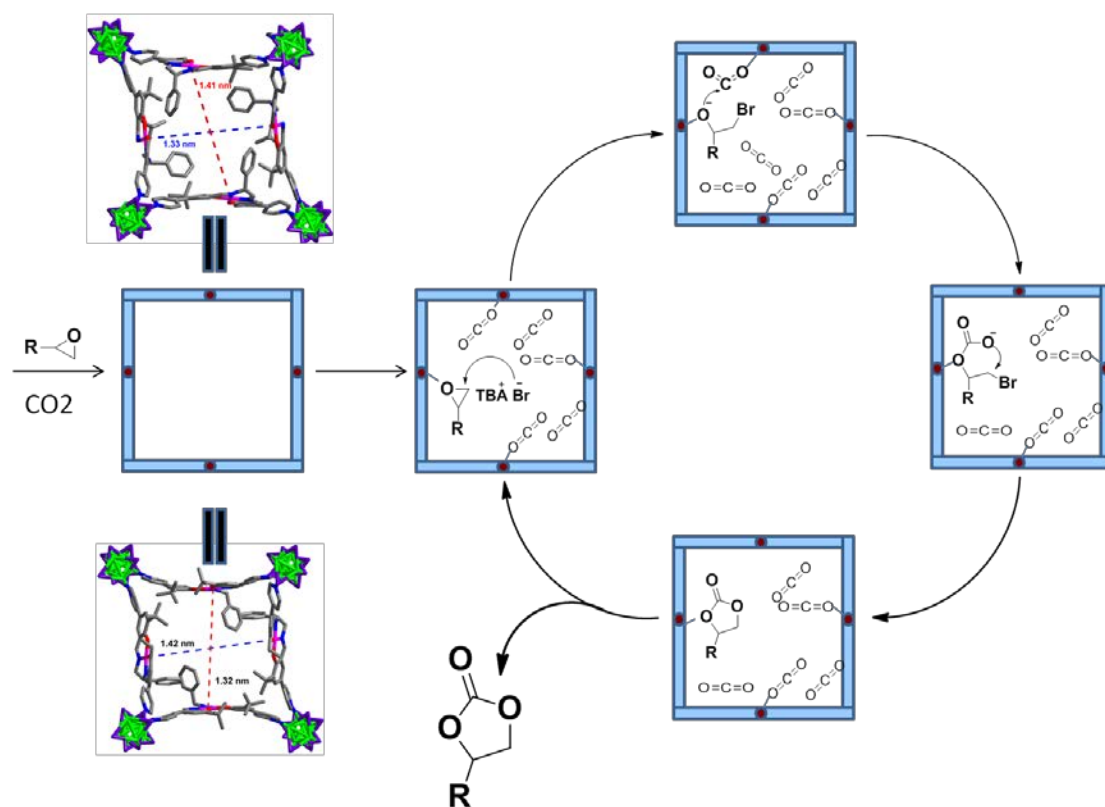

**Figure S13.** Proposed mechanism for the cycloaddition of CO<sub>2</sub> with epoxides catalyzed by **1**



**Table S1. BET plot data for 1**

|                                        |                                           |
|----------------------------------------|-------------------------------------------|
| <b>BET Surface Area:</b>               | 527.7582 ± 3.3610 m <sup>2</sup> /g       |
| <b>Slope:</b>                          | 0.008244 ± 0.000052 g/cm <sup>3</sup> STP |
| <b>Y-Intercept:</b>                    | 0.000003 ± 0.000003 g/cm <sup>3</sup> STP |
| <b>C:</b>                              | 2873.98242                                |
| <b>Qm:</b>                             | 121.252 cm <sup>3</sup> /g STP            |
| <b>Correlation Coefficient:</b>        | 0.9999595                                 |
| <b>Molecular Cross-Sectional Area:</b> | 0.1620 nm <sup>2</sup>                    |

| <b>Relative Pressure</b><br><b>(P/P<sub>0</sub>)</b> | <b>Quantity Adsorbed</b><br><b>(cm<sup>3</sup>/g STP)</b> | <b>1/[Q(P<sub>0</sub>/P - 1)]</b> |
|------------------------------------------------------|-----------------------------------------------------------|-----------------------------------|
| 0.020221646                                          | 120.6043                                                  | 0.000171                          |
| 0.030745699                                          | 123.9053                                                  | 0.000256                          |
| 0.055884706                                          | 128.4697                                                  | 0.000461                          |
| 0.084060946                                          | 131.5677                                                  | 0.000698                          |
